# Supplementary material for: Flaxseed oligosaccharides alleviate DSS-induced colitis through modulation of gut microbiota and repair of the intestinal barrier in mice
Source: Royal Society of Chemistry journal article supplement (doi:10.1039/d0fo01105c), 2020-01-01
Supplement: d0fo01105c1.pdf [file d0fo01105c1.pdf]

## Flaxseed oligosaccharides alleviate DSS-induced colitis through modulation of gut microbiota and repair of intestinal barrier in mice

Zhenxia Xu,<sup>#a</sup> Wenchao Chen,<sup>#a</sup> Qianchun Deng,<sup>a</sup> Qingde Huang,<sup>a</sup> Xu Wang,<sup>b</sup> Chen Yang,<sup>\*a</sup> and Fenghong Huang<sup>a</sup>

Supplementary material

**Table.S1 The composition and monosaccharide content of FOS.**

| Water (%) | Ash (%)   | Monosaccharide (%) |           |            |            |            |
|-----------|-----------|--------------------|-----------|------------|------------|------------|
| 5.89±0.03 | 5.23±0.05 | Rhamnose           | Fucose    | Arabinose  | Xylose     | Galactose  |
|           |           | 32.1±0.018         | 5.6±0.004 | 12.4±0.007 | 39.4±0.015 | 10.4±0.001 |

Results are expressed as the mean ± SEM.

**Table.S2 The composition of a standard diet**

| AIN93M                        | gm%     | kcal% |
|-------------------------------|---------|-------|
| Fat                           | 4       | 9.4   |
| Protein                       | 14.2    | 14.7  |
| Carbohydrate                  | 73.1    | 75.9  |
| kcal/gm                       |         | 3.85  |
| Ingredient                    | gm      | kcal  |
| Casein, 30 Mesh               | 140     | 560   |
| L-Cystine                     | 1.8     | 7.2   |
| Corn Starch                   | 495.692 | 1983  |
| Maltodextrin 10               | 125     | 500   |
| Sucrose                       | 100     | 400   |
| Cellulose                     | 50      | 0     |
| Soybean Oil                   | 40      | 360   |
| t-Butylhydroquinone           | 0.008   | 0     |
| Mineral Mix S10022M           | 35      | 0     |
| Vitamin Mix V10037            | 10      | 40    |
| Choline Bitartrate            | 2.5     | 0     |
| Total                         | 1000    | 3850  |
| *Soluble fiber/carbohydrate   | 540.85  |       |
| *Insoluble fiber/carbohydrate | 50.49   |       |

\* The total carbohydrate of corn starch was calculated as 85% within 0.1% insoluble fiber, the total carbohydrate of maltodextrin was calculated as 96%. The contents of soluble and insoluble fiber in the diet slightly varies on the different batch of the corn starch and maltodextrin.
